# Supplementary material for: Testing students’ e-learning via Facebook through Bayesian structural equation modeling
Source: PLoS One. 2017 Sep 8;12(9):e0182311. doi: 10.1371/journal.pone.0182311 (PMC5590745; doi:10.1371/journal.pone.0182311)
Supplement: S1 Data — (XLS) [file pone.0182311.s001.xls]

## Sheet: Mine 01
No	Performance Expectancy					Effort Expectancy				Facilitating Conditions					Hedonic Motivation						Social Influence				Habit				Intention to Use											Use Behavior
	PE1	PE2	PE3	PE4	PE5	EF1	EF2	EF3	EF4	FC1	FC2	FC3	FC4	FC5	HM1	HM2	HM3	HM4	HM5	HM6	SI1	SI2	SI3	SI4	Habit1	Habit2	Habit3	Habit4	ITU1	ITU2	ITU3	ITU4	ITU5	ITU6	ITU7	ITU8	ITU9	ITU10	ITU11	UB1	UB2	UB3	UB4
1	3	2	4	1	3	2	2	2	2	2	3	3	3	3	3	2	2	1	2	2	2	2	1	3	3	2	3	3	3	2	3	2	3	1	3	2	2	4	4	3	2	5	2
2	4	4	4	4	4	4	4	3	4	2	2	2	2	2	4	4	4	4	4	4	2	2	2	2	5	4	4	4	4	4	4	3	2	2	3	2	2	1	2	3	3	5	3
3	3	3	4	2	3	5	5	5	5	4	4	4	4	4	3	3	3	3	3	3	3	3	3	3	3	2	2	2	3	3	3	2	3	3	2	3	2	3	2	2	1	2	1
4	3	2	2	2	2	5	5	5	5	4	3	4	4	4	2	2	2	2	2	2	3	3	3	3	2	2	2	2	3	3	2	2	2	3	3	3	2	2	2	2	2	3	1
5	4	3	3	2	3	3	3	3	3	2	2	3	3	3	3	2	3	2	4	3	4	3	4	3	3	2	3	2	3	2	3	2	3	2	3	2	3	2	3	2	1	1	2
6	3	3	3	3	2	4	4	4	4	2	2	3	2	2	3	4	5	3	2	3	3	2	3	4	2	3	4	3	1	1	3	2	3	3	3	3	2	3	2	1	1	3	3
7	3	3	3	3	2	4	4	4	3	3	3	2	3	4	4	3	4	3	4	3	3	2	3	3	3	3	3	3	2	2	3	2	3	3	3	4	3	4	3	1	1	3	1
8	2	2	2	3	3	3	3	3	3	3	3	3	3	3	3	3	2	3	2	3	2	2	3	3	2	2	3	3	3	3	2	2	3	3	4	4	3	3	2	1	1	1	1
9	3	3	3	3	3	3	3	3	3	3	2	2	2	2	3	2	2	3	2	3	3	2	2	2	3	2	2	3	2	3	2	2	3	2	2	3	2	2	3	2	1	1	2
10	3	3	3	3	3	4	5	4	5	3	3	2	2	3	3	3	3	3	3	3	3	3	3	3	4	3	3	4	3	3	3	3	3	3	3	3	3	3	3	3	2	5	2
11	3	3	3	3	2	4	4	4	4	2	3	3	3	4	3	3	3	3	3	3	2	2	2	4	3	2	3	3	3	3	3	3	3	3	3	3	2	3	3	3	3	5	3
12	3	3	3	3	3	2	2	2	3	2	2	3	2	2	3	3	3	3	3	3	3	3	3	3	3	3	3	3	3	3	3	3	3	3	3	3	3	3	3	2	2	2	2
13	3	4	4	4	3	4	5	3	3	2	2	2	2	2	4	3	3	4	2	3	3	3	3	3	3	2	3	3	3	4	4	4	4	4	4	4	3	4	4	3	2	5	2
14	3	3	3	3	2	4	4	5	5	2	3	2	3	3	3	3	2	2	2	2	3	4	3	4	3	3	4	3	3	3	4	3	3	3	4	4	3	3	3	1	3	4	1
15	4	4	4	4	4	3	3	3	3	3	3	3	3	3	4	4	4	4	4	4	2	2	4	4	4	4	4	4	4	4	4	4	4	4	4	4	4	4	4	3	1	2	2
16	4	4	5	3	5	3	5	5	4	3	3	3	3	3	4	4	3	4	3	4	4	4	4	4	4	3	3	3	3	4	3	3	3	3	4	4	3	5	3	4	4	4	4
17	3	3	3	3	3	2	2	3	1	4	4	4	4	2	3	3	4	4	4	4	3	3	3	3	4	4	4	4	4	4	4	3	3	4	3	3	3	2	2	2	3	1	1
18	2	2	2	3	2	3	4	3	2	4	4	4	4	4	2	2	3	3	2	1	2	3	2	2	3	3	2	3	3	3	2	3	3	3	2	2	2	3	2	2	2	1	1
19	2	2	3	2	2	4	3	3	4	3	3	3	3	3	2	2	3	3	3	3	2	2	2	2	1	1	2	2	3	3	3	3	3	3	3	3	3	3	3	1	2	2	2
20	1	1	1	2	3	4	4	4	4	4	4	4	4	4	1	1	3	3	3	1	1	1	2	3	3	3	2	3	3	2	3	3	3	4	2	1	3	1	3	2	1	4	2
21	3	4	3	4	4	2	2	2	2	4	4	4	4	4	4	4	3	4	4	3	4	3	4	5	4	4	3	4	3	3	4	3	3	3	4	3	4	4	3	1	1	3	1
22	3	3	3	3	3	4	4	4	4	3	4	4	4	4	3	3	3	3	3	3	3	3	3	3	3	3	3	3	3	3	3	3	3	3	3	3	3	3	3	1	1	3	3
23	4	4	4	4	4	4	4	4	5	4	4	4	4	4	4	4	4	4	4	4	4	4	4	4	4	4	4	4	4	4	4	4	4	4	4	4	4	4	4	1	1	3	1
24	2	3	3	3	3	3	4	4	4	3	4	4	4	4	3	3	3	3	3	1	3	3	3	3	3	3	3	3	4	4	4	4	4	4	4	4	4	4	4	1	1	3	1
25	2	2	2	2	2	3	3	3	3	3	3	3	3	3	2	2	2	2	2	2	2	2	2	2	2	2	2	2	2	2	2	2	2	2	2	2	2	2	2	1	3	1	1
26	4	4	4	4	4	3	2	3	4	3	2	4	2	3	4	4	4	4	4	4	5	5	5	5	4	4	3	3	5	5	4	5	5	4	4	4	4	5	4	1	2	2	1
27	4	3	4	4	4	4	4	4	4	3	4	3	3	2	4	4	4	4	4	4	4	3	4	4	4	4	4	4	4	4	4	4	4	4	4	4	4	4	4	2	3	2	2
28	2	2	3	3	3	4	3	3	5	3	4	5	5	4	2	3	2	3	2	2	1	1	2	2	2	2	3	1	3	2	2	3	3	2	3	2	2	2	3	2	1	2	1
29	2	2	3	2	2	2	3	2	3	2	3	3	3	3	2	2	2	2	2	1	2	2	1	2	2	1	1	2	2	1	2	3	2	1	2	3	2	1	2	1	4	4	2
30	3	3	2	3	4	4	4	4	4	3	3	3	3	3	2	3	3	3	3	3	3	2	2	2	2	2	2	2	4	3	2	3	3	2	3	2	3	2	2	1	1	1	1
31	3	3	3	3	3	4	4	4	4	5	4	4	4	5	3	2	3	2	2	2	2	2	3	2	3	2	2	3	2	3	2	3	2	3	3	3	3	3	3	2	2	2	2
32	3	2	2	2	2	4	4	4	4	3	4	3	3	4	2	2	3	3	2	2	1	1	2	3	3	2	2	2	3	3	3	2	3	3	3	3	2	2	2	2	3	4	1
33	3	3	2	2	3	4	4	4	4	4	4	4	4	4	2	2	2	2	2	3	2	3	4	3	3	4	4	4	3	2	3	4	3	4	3	2	3	2	3	1	1	3	3
34	2	3	3	3	4	2	3	4	4	3	3	3	2	2	3	2	3	3	3	3	2	2	2	2	3	2	3	3	2	3	2	3	2	3	2	3	3	2	2	1	1	3	1
35	2	2	3	2	2	3	4	2	5	3	2	2	3	3	2	2	3	2	2	2	2	2	2	3	2	2	3	2	2	2	2	2	3	2	2	2	3	2	3	1	1	3	1
36	2	2	2	2	2	3	3	3	3	3	3	2	2	2	2	2	2	2	2	2	2	2	2	2	2	3	3	2	2	2	3	3	2	2	3	2	2	2	2	1	3	1	1
37	2	3	2	3	3	4	4	4	4	2	3	3	3	3	2	2	2	3	2	3	2	2	3	2	2	2	2	3	2	2	3	2	2	2	3	2	2	2	2	1	2	2	1
38	3	3	3	3	3	4	4	4	4	2	2	2	2	2	3	3	3	3	3	3	3	3	3	3	3	3	3	3	3	3	3	3	3	3	3	3	3	3	3	2	2	2	2
39	3	3	3	3	3	2	2	2	2	4	4	3	4	4	3	3	3	3	3	3	2	2	2	2	1	1	1	1	3	3	3	3	3	3	3	3	2	2	3	2	2	1	1
40	4	4	4	4	2	2	2	2	2	5	5	5	5	5	4	4	4	4	4	4	2	2	2	4	4	2	4	4	4	4	4	4	4	4	4	4	2	3	4	2	2	2	1
41	4	4	4	4	4	4	3	3	3	5	5	5	5	5	2	1	1	1	2	1	5	5	5	5	4	1	5	5	3	2	2	4	4	2	2	2	2	2	4	3	4	4	2
42	3	3	3	3	3	4	3	3	2	3	3	3	3	3	3	4	4	4	3	4	2	3	3	3	3	3	1	2	3	3	3	3	3	3	4	4	2	3	3	2	3	3	1
43	4	4	4	4	4	3	3	3	3	4	4	4	4	4	4	4	4	4	4	4	2	2	2	4	4	4	4	4	4	4	4	4	4	4	4	4	4	4	4	3	3	5	1
44	4	4	4	4	4	4	4	4	4	4	4	4	3	3	4	4	4	4	4	4	4	4	4	4	4	3	3	3	4	4	4	4	4	4	4	4	1	4	3	2	2	2	1
45	3	4	4	4	4	4	4	4	4	3	3	3	3	3	4	3	3	3	3	3	3	3	3	3	3	3	3	3	4	4	4	4	4	4	4	4	3	4	4	1	2	5	2
46	4	4	4	4	4	5	5	5	5	3	3	3	3	4	3	3	3	3	2	2	2	2	2	5	3	2	2	3	3	2	2	3	3	4	5	3	1	4	2	1	3	3	1
47	3	4	4	4	4	4	4	4	4	4	5	4	5	4	3	3	3	3	2	2	3	3	3	3	2	2	2	2	3	3	3	3	3	3	3	3	3	3	3	2	2	1	1
48	3	3	3	3	3	5	5	5	5	4	4	4	4	4	3	3	3	3	3	3	3	3	3	3	3	3	3	3	4	3	3	3	3	3	4	3	3	3	4	3	1	1	1
49	3	2	4	2	3	4	3	2	3	2	2	2	3	3	3	5	4	3	2	3	3	2	3	4	3	2	3	3	3	4	2	3	1	3	2	4	4	1	3	1	2	3	1
50	3	4	3	3	2	2	4	4	2	4	5	3	3	3	2	3	3	3	2	2	2	2	2	3	2	2	1	2	3	3	3	3	3	2	2	3	2	3	4	2	3	2	1
51	3	4	5	5	4	3	3	3	4	4	4	5	5	5	5	5	5	5	5	5	2	3	3	4	3	3	3	4	4	4	4	3	4	5	4	4	5	4	4	3	1	2	2
52	2	3	3	3	3	5	5	5	5	3	3	3	3	3	5	3	4	4	3	3	2	2	2	1	1	1	1	2	2	2	3	2	2	3	3	1	3	3	2	1	3	5	1
53	3	3	3	3	3	3	3	3	3	3	5	5	4	5	3	4	3	4	4	4	2	2	4	4	4	4	4	4	3	3	3	3	3	3	3	3	3	4	4	2	1	2	2
54	5	4	4	4	5	4	5	4	5	2	2	3	1	2	5	4	4	4	5	5	5	4	4	5	5	5	5	4	5	5	4	4	4	5	5	5	5	5	4	2	3	5	2
55	3	4	3	3	4	3	3	3	3	3	4	3	2	3	3	2	4	3	3	3	2	3	4	3	2	2	2	2	2	3	3	3	2	3	3	2	3	2	3	1	3	5	4
56	4	4	4	4	4	1	4	2	2	4	3	3	4	3	5	5	5	5	4	5	4	3	4	4	4	4	5	3	4	5	4	3	4	4	5	4	5	4	5	1	4	2	2
57	3	3	3	2	2	1	3	2	2	4	4	4	4	4	4	3	3	2	3	3	2	2	2	3	2	2	2	2	3	3	3	2	4	3	3	2	2	2	2	2	2	2	2
58	3	2	2	3	3	3	5	5	3	2	2	2	2	2	3	2	3	3	2	3	2	2	3	3	2	1	2	1	3	3	2	2	3	3	3	4	4	4	4	2	2	4	2
59	3	3	2	2	2	4	4	4	4	4	4	4	4	4	3	3	4	4	3	3	2	2	3	3	3	1	2	4	3	3	4	4	4	3	4	4	2	3	3	1	1	2	2
60	2	3	3	3	3	4	4	4	4	4	4	4	5	4	4	4	4	4	3	3	4	4	4	4	4	2	4	3	4	4	4	4	2	3	3	3	3	2	3	3	3	5	3
61	2	4	4	4	4	4	2	2	3	3	2	1	2	3	2	3	3	3	2	3	3	3	3	3	3	2	2	2	2	2	2	2	4	3	2	3	3	3	3	3	2	3	3
62	4	3	3	3	3	3	2	2	3	3	3	3	2	2	2	4	4	5	3	2	3	2	2	2	2	2	3	2	3	2	2	3	2	3	2	3	2	4	4	5	3	2	3
63	4	4	4	4	4	4	1	1	3	3	3	1	1	1	2	3	3	4	2	2	3	3	2	2	1	1	2	3	3	2	2	2	3	3	3	2	3	3	3	4	2	2	3
64	2	4	4	4	4	4	4	4	3	4	4	3	4	3	4	4	4	4	2	2	2	2	2	3	2	3	4	3	3	4	4	4	3	2	3	4	3	4	4	4	2	2	2
65	4	3	4	4	4	4	3	3	3	3	3	3	3	3	3	3	2	2	3	2	3	3	3	3	2	2	2	2	3	2	3	3	2	3	2	3	2	3	2	2	3	2	3
66	5	4	4	4	4	4	4	4	4	4	4	4	4	4	4	2	3	3	2	2	3	2	2	2	2	2	2	3	2	2	3	2	2	2	2	2	3	2	3	3	2	2	3
67	4	3	4	4	4	4	3	3	3	3	3	1	3	3	3	2	2	2	2	2	2	2	2	2	2	2	2	2	2	3	3	2	2	2	3	3	2	2	2	2	2	2	2
68	3	3	3	3	3	3	2	2	2	2	2	2	2	2	2	3	3	3	2	2	2	3	2	3	2	2	3	2	2	2	2	3	2	2	3	2	2	3	3	3	2	2	2
69	4	3	2	4	2	3	4	4	4	4	4	4	5	5	5	2	2	2	3	3	3	3	3	3	3	3	3	3	3	3	3	3	3	3	3	3	3	2	2	2	3	3	3
70	4	3	4	3	3	2	4	4	4	4	4	4	4	3	4	3	4	4	3	3	3	3	3	3	2	2	2	2	1	1	1	1	3	3	3	3	3	3	4	4	3	3	3
71	5	3	4	5	5	4	2	3	2	3	2	2	1	1	2	5	5	5	4	4	4	4	4	4	2	2	2	4	4	2	4	4	4	4	4	4	4	5	5	5	4	4	4
72	3	2	3	3	3	3	2	2	2	2	2	1	2	2	1	5	5	5	2	1	1	1	2	1	5	5	5	5	4	1	5	5	3	2	2	4	4	5	5	5	2	1	1
73	4	3	3	3	3	3	2	3	3	3	3	3	3	2	2	3	3	3	3	4	4	4	3	4	2	3	3	3	3	3	1	2	3	3	3	3	3	3	3	3	3	4	4
74	4	5	4	4	4	5	3	2	3	2	2	2	2	2	3	4	4	4	4	4	4	4	4	4	2	2	2	4	4	4	4	4	4	4	4	4	4	4	4	4	4	4	4
75	4	3	4	3	3	4	2	2	3	3	2	2	1	1	2	4	3	3	4	4	4	4	4	4	4	4	4	4	4	3	3	3	4	4	4	4	4	4	3	3	4	4	4
76	4	4	4	4	4	4	2	2	2	2	2	3	2	3	4	3	3	3	4	3	3	3	3	3	3	3	3	3	3	3	3	3	4	4	4	4	4	3	3	3	4	3	3
77	4	3	3	3	2	2	3	2	3	3	3	3	2	2	2	3	3	4	3	3	3	3	2	2	2	2	2	5	3	2	2	3	3	2	2	3	3	3	3	4	3	3	3
78	5	3	2	2	3	3	2	2	3	2	2	2	2	2	2	4	5	4	3	3	3	3	2	2	3	3	3	3	2	2	2	2	3	3	3	3	3	4	5	4	3	3	3
79	3	3	3	2	2	2	2	2	2	2	2	2	2	2	2	4	4	4	3	3	3	3	3	3	3	3	3	3	3	3	3	3	4	3	3	3	3	4	4	4	3	3	3
80	4	2	3	3	3	3	2	2	2	3	2	3	2	2	3	3	3	3	2	3	3	3	3	3	3	2	2	2	2	2	2	2	4	3	2	3	3	2	3	3	3	5	4
81	4	2	2	2	2	2	3	3	3	3	3	3	3	3	3	4	4	5	3	2	3	2	2	2	2	2	3	2	3	2	2	3	2	3	2	3	2	3	3	3	2	3	3
82	2	4	4	3	4	4	3	3	3	3	3	3	2	2	2	3	3	4	2	2	3	3	2	2	1	1	2	3	3	2	2	2	3	3	3	2	3	5	5	5	5	5	5
83	2	5	5	5	5	5	4	4	4	4	4	4	2	2	2	4	4	4	2	2	2	2	2	3	2	3	4	3	3	4	4	4	3	2	3	4	3	3	3	3	2	3	3
84	3	5	5	5	5	5	2	1	1	1	2	1	5	5	5	3	2	2	3	2	3	3	3	3	2	2	2	2	3	2	3	3	2	3	2	3	2	4	4	5	3	2	3
85	2	3	3	3	3	3	3	4	4	4	3	4	2	3	3	2	3	3	2	2	3	2	2	2	2	2	2	3	2	2	3	2	2	2	2	2	3	3	3	4	2	2	3
86	3	4	4	4	4	4	4	4	4	4	4	4	2	2	2	2	2	2	2	2	2	2	2	2	2	2	2	2	2	3	3	2	2	2	3	3	2	4	4	4	2	2	2
87	4	4	4	4	3	3	4	4	4	4	4	4	4	4	4	3	3	3	2	2	2	3	2	3	2	2	3	2	2	2	2	3	2	2	3	2	2	3	2	2	3	2	3
88	4	3	3	3	3	3	4	3	3	3	3	3	3	3	3	2	2	2	3	3	3	3	3	3	3	3	3	3	3	3	3	3	3	3	3	3	3	2	3	3	2	2	3
89	5	3	3	3	3	4	3	3	3	3	2	2	2	2	2	3	4	4	3	3	3	3	3	3	2	2	2	2	1	1	1	1	3	3	3	3	3	2	2	2	2	2	2
90	4	4	5	4	5	4	3	3	3	3	2	2	3	3	3	5	5	5	4	4	4	4	4	4	2	2	2	4	4	2	4	4	4	4	4	4	4	3	3	3	2	2	2
91	5	4	4	4	4	4	3	3	3	3	3	3	3	3	3	5	5	5	2	1	1	1	2	1	5	5	5	5	4	1	5	5	3	2	2	4	4	2	2	2	3	3	3
92	3	2	2	2	3	3	3	5	4	3	2	3	3	2	3	3	3	3	3	4	4	4	3	4	2	3	3	3	3	3	1	2	3	3	3	3	3	3	4	4	3	3	3
93	3	3	3	2	3	3	3	3	3	3	2	2	2	2	2	4	4	4	4	4	4	4	4	4	2	2	2	4	4	4	4	4	4	4	4	4	4	5	5	5	4	4	4
94	4	4	5	3	2	3	2	2	2	2	2	3	2	3	2	4	3	3	4	4	4	4	4	4	4	4	4	4	4	3	3	3	4	4	4	4	4	5	5	5	2	1	1
95	3	3	4	2	2	3	3	2	2	1	1	2	3	3	2	3	3	3	4	3	3	3	3	3	3	3	3	3	3	3	3	3	4	4	4	4	4	3	3	3	3	4	4
96	4	4	4	2	2	2	2	2	3	2	3	4	3	3	4	3	3	4	3	3	3	3	2	2	2	2	2	5	3	2	2	3	3	2	2	3	3	4	4	4	4	4	4
97	3	2	2	3	2	3	3	3	3	2	2	2	2	3	2	4	5	4	3	3	3	3	2	2	3	3	3	3	2	2	2	2	3	3	3	3	3	4	3	3	4	4	4
98	2	3	3	2	2	3	2	2	2	2	2	2	3	2	2	4	4	4	3	3	3	3	3	3	3	3	3	3	3	3	3	3	4	3	3	3	3	3	3	3	4	3	3
99	2	2	2	2	2	2	2	2	2	2	2	2	2	2	3	2	3	3	3	5	4	3	2	3	3	2	3	4	3	2	3	3	3	4	2	3	1	3	3	4	3	3	3
100	3	3	3	2	2	2	3	2	3	2	2	3	2	2	2	3	3	3	2	3	3	3	2	2	2	2	2	3	2	2	1	2	3	3	3	3	3	4	5	4	3	3	3
101	2	2	2	3	3	3	3	3	3	3	3	3	3	3	3	5	5	5	5	5	5	5	5	5	2	3	3	4	3	3	3	4	4	4	4	3	4	4	4	4	3	3	3
102	3	4	4	3	3	3	3	3	3	2	2	2	2	1	1	3	3	3	5	3	4	4	3	3	2	2	2	1	1	1	1	2	2	2	3	2	2	2	3	3	3	5	4
103	5	5	5	4	4	4	4	4	4	2	2	2	4	4	2	5	4	5	3	4	3	4	4	4	2	2	4	4	4	4	4	4	3	3	3	3	3	3	3	3	2	3	3
104	5	5	5	2	1	1	1	2	1	5	5	5	5	4	1	5	5	3	2	2	4	3	3	4	5	4	5	3	3	2	2	3	3	3	3	3	3	3	3	3	5	5	5
105	3	3	3	3	4	4	4	3	4	2	3	3	3	3	3	1	2	3	3	3	3	3	2	4	4	4	4	2	3	3	3	4	3	3	3	3	3	3	2	2	5	3	4
106	4	4	4	4	4	4	4	4	4	2	2	2	4	4	4	4	4	4	4	4	4	3	3	2	2	2	3	2	2	3	2	2	3	3	3	3	3	3	3	3	3	4	3
107	4	3	3	4	4	4	4	4	4	4	4	4	4	4	3	3	3	4	4	4	4	4	3	4	5	3	3	2	2	2	2	2	4	3	3	4	2	3	3	3	4	3	3
108	3	3	3	4	3	3	3	3	3	3	3	3	3	3	3	3	3	4	4	4	4	3	2	4	4	5	5	2	3	2	3	3	3	3	2	2	2	2	3	4	4	3	2
109	3	3	4	3	3	3	3	2	2	2	2	2	5	3	2	2	3	3	2	2	3	4	4	3	3	3	3	3	3	3	3	3	4	4	4	4	4	4	2	2	2	3	2
110	4	5	4	3	3	3	3	2	2	3	3	3	3	2	2	2	2	3	3	3	3	3	5	3	5	5	4	3	3	3	3	3	4	4	3	4	3	4	4	4	3	3	3
111	4	4	4	3	3	3	3	3	3	3	3	3	3	3	3	3	3	4	3	3	3	3	3	2	2	3	1	4	4	4	4	2	3	3	4	4	4	4	3	3	3	2	3
112	2	3	3	3	5	4	3	2	3	3	2	3	4	3	2	3	3	3	4	2	3	3	2	3	4	3	2	4	4	4	4	4	2	2	3	3	2	1	2	3	2	3	2
113	3	3	3	2	3	3	3	2	2	2	2	2	3	2	2	1	2	3	3	3	3	2	2	4	3	3	4	3	3	3	3	3	2	2	3	3	3	3	2	2	2	2	2
114	5	5	5	5	5	5	5	5	5	2	3	3	4	3	3	3	4	4	4	4	3	2	3	4	4	4	4	4	4	4	4	4	1	1	3	3	3	1	1	1	2	2	3
115	3	3	3	5	3	4	4	3	3	2	2	2	1	1	1	1	2	2	2	3	2	4	4	2	2	2	2	4	4	4	4	4	4	4	3	4	4	3	4	3	2	2	3
116	5	4	5	3	4	3	4	4	4	2	2	4	4	4	4	4	4	3	3	3	3	3	3	4	4	4	4	3	4	4	4	4	3	3	3	3	3	3	3	3	3	3	3
117	3	3	4	5	4	5	3	3	2	2	3	3	3	3	3	3	3	3	3	3	3	4	4	4	4	4	5	4	4	4	4	4	4	4	4	4	4	4	4	4	3	3	3
118	3	2	4	4	4	4	2	3	3	3	4	3	3	3	3	3	3	2	2	3	2	3	3	3	4	4	4	3	4	4	4	4	3	3	3	3	3	1	3	3	4	4	4
119	3	3	2	2	2	3	2	2	3	2	2	3	3	3	3	3	3	3	3	3	3	2	2	3	3	3	3	3	3	3	3	3	2	2	2	2	2	2	2	2	3	2	2
120	4	3	4	5	3	3	2	2	2	2	2	4	3	3	4	2	3	3	3	4	3	4	4	3	2	3	4	3	2	4	2	3	4	4	4	4	4	4	5	5	3	3	3
121	3	2	4	4	5	5	2	3	2	3	3	3	3	2	2	2	2	3	4	3	2	4	4	4	4	4	4	3	4	3	3	2	4	4	4	4	4	4	4	3	4	4	4
122	4	4	3	3	3	3	3	3	3	3	3	4	4	4	4	4	4	2	2	4	4	3	3	4	3	3	5	3	4	5	5	4	2	3	2	3	2	2	1	1	4	4	4
123	3	5	3	5	5	4	3	3	3	3	3	4	4	3	4	3	4	4	4	3	5	2	2	2	3	2	3	2	3	3	3	3	2	2	2	2	2	1	2	2	4	4	4
124	3	3	2	2	3	1	4	4	4	4	2	3	3	4	4	4	4	3	3	3	3	3	4	4	4	4	4	3	3	3	3	3	2	3	3	3	3	3	3	2	3	2	2
125	3	2	3	4	3	2	4	4	4	4	4	2	2	3	3	2	1	2	3	3	2	3	3	4	4	4	4	5	4	4	4	5	3	2	3	2	2	2	2	2	3	3	3
126	2	2	4	3	3	4	3	3	3	3	3	2	2	3	3	3	3	2	2	2	2	2	2	4	4	4	4	3	4	3	3	4	2	2	3	3	2	2	1	1	4	3	3
127	2	3	4	4	4	4	4	4	4	4	4	1	1	3	3	3	1	1	1	2	3	2	3	4	4	4	4	4	4	4	4	4	2	2	2	2	2	3	2	3	3	4	2
128	4	4	2	2	2	2	4	4	4	4	4	4	4	3	4	4	3	4	3	4	4	3	4	2	3	4	4	3	3	3	2	2	3	2	3	3	3	3	2	2	3	3	3
129	3	3	4	4	4	4	3	4	4	4	4	3	3	3	3	3	3	3	3	3	3	2	2	3	4	2	5	3	2	2	3	3	2	2	3	2	2	2	2	2	4	4	4
130	4	4	4	4	4	5	4	4	4	4	4	4	4	4	4	4	4	4	4	4	4	2	2	3	3	3	3	3	3	2	2	2	2	2	2	2	2	2	2	2	2	2	3
131	3	3	3	4	4	4	3	4	4	4	4	3	3	3	3	3	1	3	3	3	3	3	3	4	4	4	4	2	3	3	3	3	2	2	2	3	2	3	2	2	3	3	3
132	2	2	3	3	3	3	3	3	3	3	3	2	2	2	2	2	2	2	2	2	2	3	3	4	4	4	4	2	2	2	2	2	3	3	3	3	3	3	3	3	3	3	3
133	4	4	3	2	3	4	3	2	4	2	3	4	4	4	4	4	4	5	5	4	4	3	3	2	2	2	2	4	4	3	4	4	3	3	3	3	3	3	2	2	3	3	3
134	4	4	4	4	4	4	3	4	3	3	2	4	4	4	4	4	4	4	3	4	4	4	2	2	2	2	2	5	5	5	5	5	4	4	4	4	4	4	2	2	3	3	3
135	3	3	4	3	3	5	3	4	5	5	4	2	3	2	3	2	2	1	1	3	3	4	4	4	3	3	3	5	5	5	5	5	2	1	1	1	2	1	5	5	4	3	3
136	2	2	2	3	2	3	2	3	3	3	3	2	2	2	2	2	1	2	2	2	2	3	3	4	3	3	2	3	3	3	3	3	3	4	4	4	3	4	2	3	3	3	2
137	3	4	4	4	4	4	3	3	3	3	3	2	3	3	3	3	3	3	2	3	4	4	4	3	3	3	3	4	4	4	4	4	4	4	4	4	4	4	2	2	4	4	4
138	3	3	4	4	4	4	5	4	4	4	5	3	2	3	2	2	2	2	2	3	3	4	4	4	4	4	4	4	4	4	3	3	4	4	4	4	4	4	4	4	4	4	3
139	2	2	4	4	4	4	3	4	3	3	4	2	2	3	3	2	2	1	1	2	2	4	4	4	4	4	4	3	3	3	3	3	4	3	3	3	3	3	3	3	3	3	4
140	2	3	4	4	4	4	4	4	4	4	4	2	2	2	2	2	3	2	3	2	3	4	4	5	5	5	5	3	3	3	3	4	3	3	3	3	2	2	2	2	2	2	3
141	3	4	2	3	4	4	3	3	3	2	2	3	2	3	3	3	3	2	2	3	4	4	4	4	4	4	4	4	5	4	5	4	3	3	3	3	2	2	3	3	2	2	3
142	2	2	3	4	2	5	3	2	2	3	3	2	2	3	2	2	2	2	2	2	2	3	3	5	5	5	5	4	4	4	4	4	3	3	3	3	3	3	3	3	1	1	3
143	2	2	3	3	3	3	3	3	2	2	2	2	2	2	2	2	2	2	2	2	2	2	3	4	3	2	3	2	2	2	3	3	3	5	4	3	2	3	3	2	4	4	3
144	3	3	4	4	4	4	2	3	3	3	3	2	2	2	3	2	3	2	2	3	3	3	2	2	4	4	2	4	5	3	3	3	2	3	3	3	2	2	2	2	3	3	3
145	3	3	4	4	4	4	2	2	2	2	2	3	3	3	3	3	3	3	3	3	3	5	4	3	3	3	4	4	4	5	5	5	5	5	5	5	5	5	2	3	4	4	4
146	3	3	2	2	2	2	4	4	3	4	4	3	3	3	3	3	3	2	2	3	3	3	3	5	5	5	5	3	3	3	3	3	5	3	4	4	3	3	2	2	3	3	3
147	4	2	2	2	2	2	5	5	5	5	5	4	4	4	4	4	4	2	2	4	2	3	3	3	3	3	3	3	5	5	4	5	3	4	3	4	4	4	2	2	2	2	2
148	4	4	4	3	3	3	5	5	5	5	5	2	1	1	1	2	1	5	5	4	4	4	5	4	5	4	5	2	2	3	1	2	5	4	4	4	5	5	5	4	4	4	4
149	3	3	4	3	3	2	3	3	3	3	3	3	4	4	4	3	4	2	3	3	3	3	4	3	3	3	3	3	4	3	2	3	3	2	4	3	3	3	2	3	4	4	4
150	4	4	3	3	3	3	4	4	4	4	4	4	4	4	4	4	4	2	2	4	4	4	4	1	4	2	2	4	3	3	4	3	5	5	5	5	4	5	4	3	2	3	2
151	4	4	4	4	4	4	4	4	4	3	3	4	4	4	4	4	4	4	4	4	4	2	2	1	3	2	2	4	4	4	4	4	4	3	3	2	3	3	2	2	2	2	2
152	4	4	4	4	4	4	3	3	3	3	3	4	3	3	3	3	3	3	3	4	4	3	3	3	5	5	3	2	2	2	2	2	3	2	3	3	2	3	2	2	2	3	3
153	4	4	5	5	5	5	3	3	3	3	4	3	3	3	3	2	2	2	2	4	4	2	2	4	4	4	4	4	4	4	4	4	3	3	4	4	3	3	2	2	3	2	3
154	4	4	4	4	4	4	4	5	4	5	4	3	3	3	3	2	2	3	3	4	4	3	3	4	4	4	4	4	4	4	5	4	4	4	4	4	3	3	4	4	2	2	3
155	3	3	5	5	5	5	4	4	4	4	4	3	3	3	3	3	3	3	3	3	3	4	4	4	2	2	3	3	2	1	2	3	2	3	3	3	2	3	3	3	2	2	2
156	2	3	4	3	2	3	2	2	2	3	3	3	5	4	3	2	3	3	2	2	3	3	3	3	2	2	3	3	3	3	2	2	2	4	4	5	3	2	3	2	3	2	3
157	3	2	2	4	4	2	4	5	3	3	3	2	3	3	3	2	2	2	2	3	2	4	4	4	1	1	3	3	3	1	1	1	2	3	3	4	2	2	3	3	2	2	3
158	5	4	3	3	3	4	4	4	5	5	5	5	5	5	5	5	5	2	3	5	4	4	4	4	4	4	3	4	4	3	4	3	4	4	4	4	2	2	2	2	2	2	2
159	3	3	5	5	5	5	3	3	3	3	3	5	3	4	4	3	3	2	2	3	3	4	4	4	3	3	3	3	3	3	3	3	3	3	2	2	3	2	3	3	2	2	2
160	3	3	3	3	3	3	3	5	5	4	5	3	4	3	4	4	4	2	2	3	3	4	4	4	4	4	4	4	4	4	4	4	4	2	3	3	2	2	3	2	3	3	3
161	4	5	4	5	4	5	2	2	3	1	2	5	4	4	4	5	5	5	4	4	5	4	4	4	3	3	3	3	3	1	3	3	3	2	2	2	2	2	2	2	3	3	3
162	3	4	3	3	3	3	3	4	3	2	3	3	2	4	3	3	3	2	3	3	4	3	3	3	2	2	2	2	2	2	2	2	2	3	3	3	2	2	2	3	4	4	4
163	4	4	1	4	2	2	4	3	3	4	3	5	5	5	5	4	5	4	3	4	4	4	2	3	4	4	4	4	4	4	5	5	5	2	2	2	3	3	3	3	2	1	1
164	2	2	1	3	2	2	4	4	4	4	4	4	3	3	2	3	3	2	2	2	2	3	3	2	4	4	4	4	4	4	4	3	4	3	4	4	3	3	3	3	3	4	4
165	3	3	3	5	5	3	2	2	2	2	2	3	2	3	3	2	3	2	2	3	3	5	5	4	2	3	2	3	2	2	1	1	2	5	5	5	4	4	4	4	4	4	4
166	2	2	4	4	4	4	4	4	4	4	4	3	3	4	4	3	3	2	2	2	2	3	3	3	2	2	2	2	2	1	2	2	1	5	5	5	2	1	1	1	4	4	4
167	3	3	4	4	4	4	4	4	4	5	4	4	4	4	4	3	3	4	4	3	3	3	3	3	2	3	3	3	3	3	3	2	2	3	3	3	3	4	4	4	4	3	3
168	4	4	4	2	2	3	3	2	1	2	3	2	3	3	3	2	3	3	3	4	4	4	4	5	3	2	3	2	2	2	2	2	3	4	4	4	4	4	4	4	3	3	3
169	3	3	3	2	2	3	3	3	3	2	2	2	4	4	5	3	2	3	2	3	3	3	3	4	2	2	3	3	2	2	1	1	2	4	3	3	4	4	4	4	3	3	3
170	4	4	4	1	1	3	3	3	1	1	1	2	3	3	4	2	2	3	3	4	4	4	4	4	2	2	2	2	2	3	2	3	4	3	3	3	4	3	3	3	3	3	3
